# Supplementary material
Source: PubMed Central journal article supplement (PMC3186428)
Supplement: supp_M111.264978_jbc.M111.264978-1.pdf [file supp_M111.264978_jbc.M111.264978-1.pdf]

## SUPPLEMENTARY FIGURES

### $\text{GFP}^{\text{PTHR}}$ (+ NHERF)

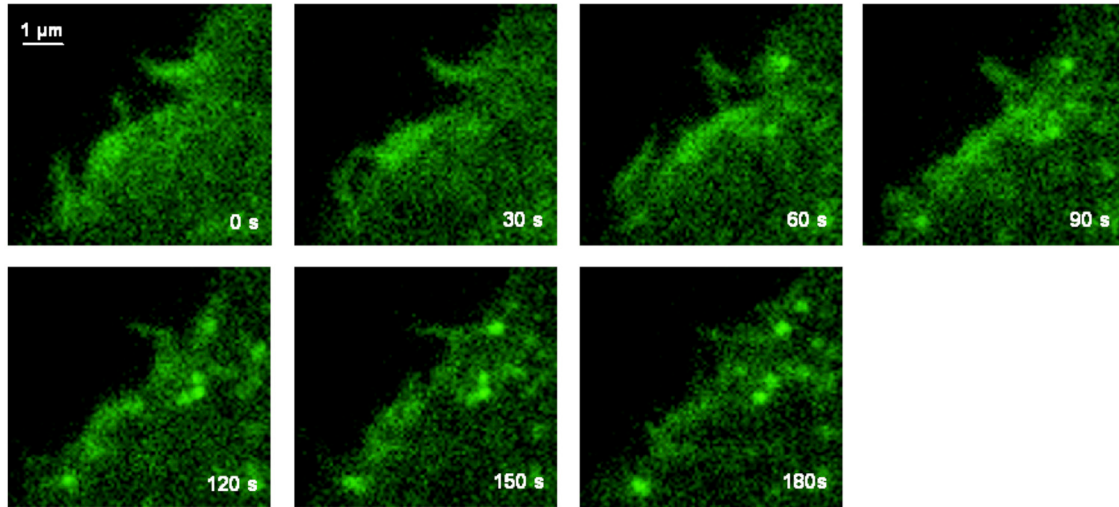

### mCherryNHERF (+ PTHR)

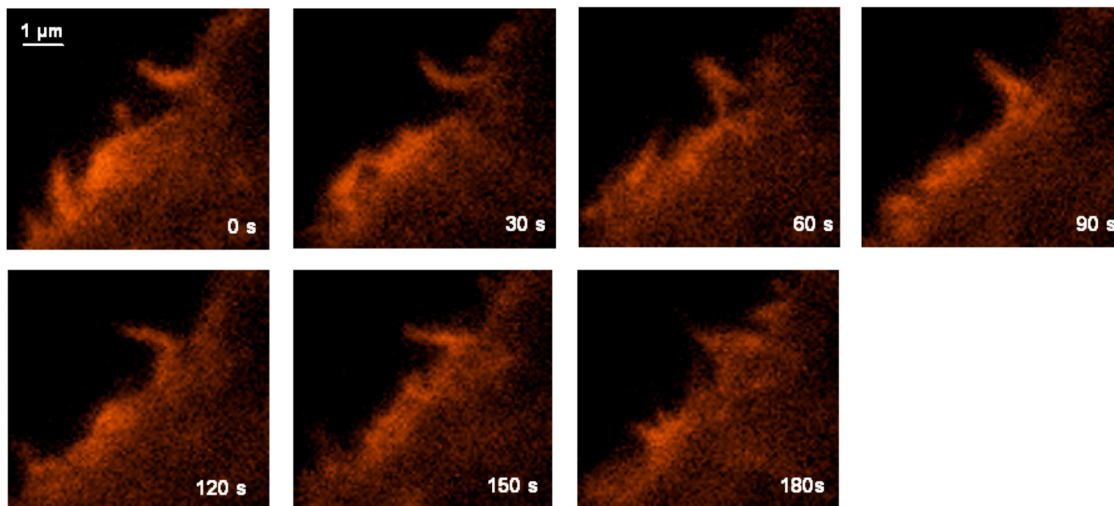

Supplementary Figure 1. **PTHR clusters after PTH stimulation dissociate from NHERF1.** TIRF images corresponding to  $\text{GFP}^{\text{PTHR}}$  (top panel) or  $\text{mCherry}^{\text{NHERF}}$  (bottom panel) at the cell membrane after stimulation with 100 nM hPTH(1-34). Representative images from 10 cells corresponding to 3 independent experiments are shown.

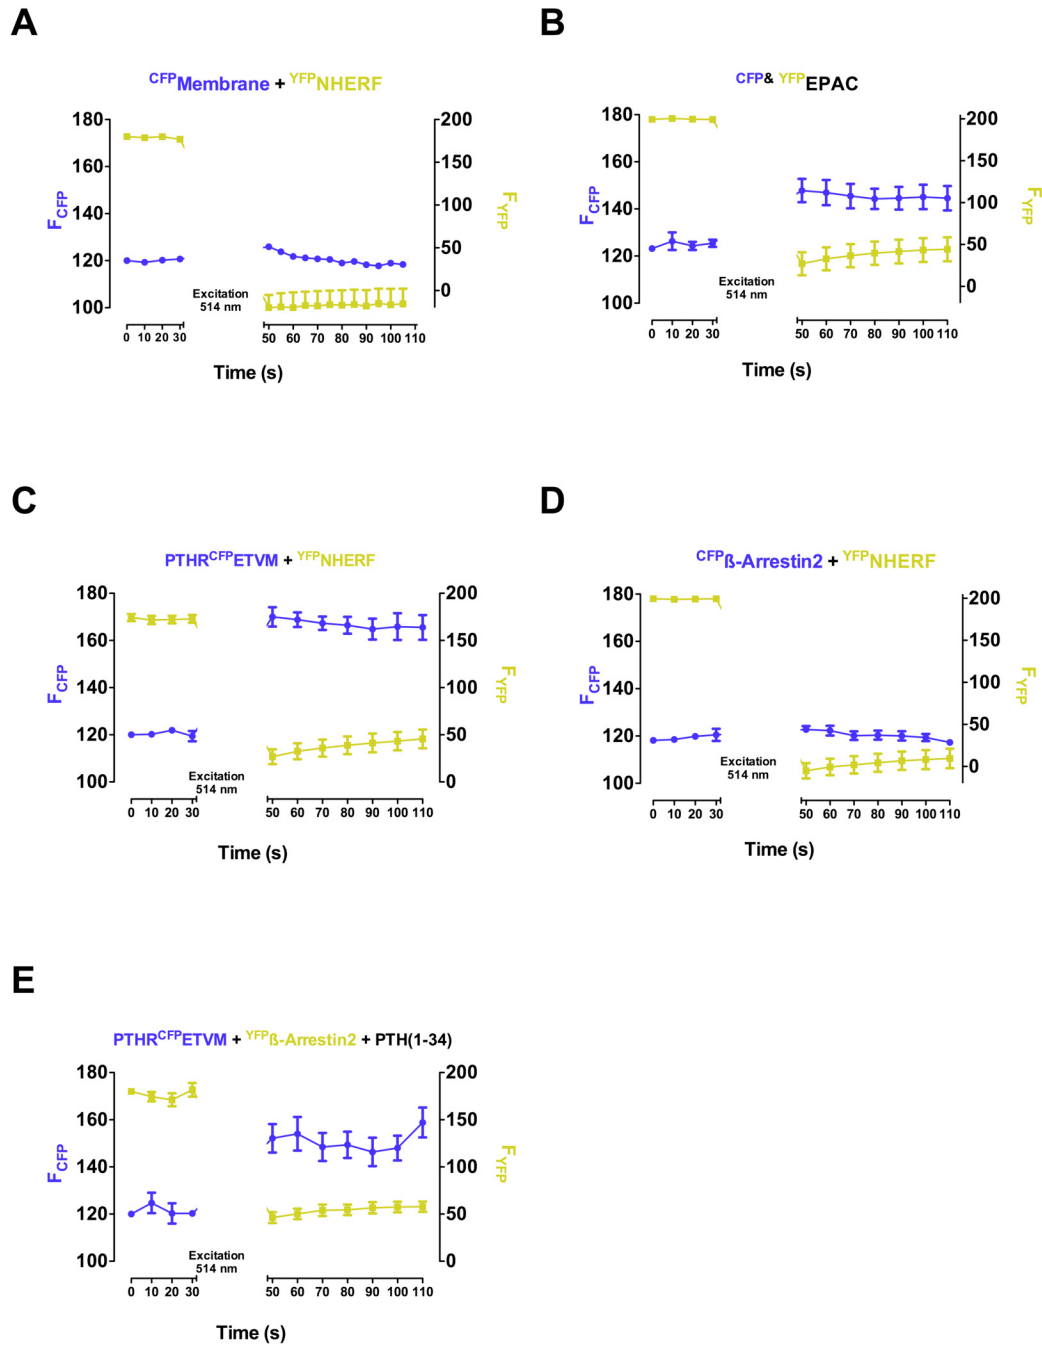

Supplementary Figure 2. **NHERF1-β-arrestin interactions.** Donor dequenching after acceptor photobleaching was used as described in Materials and Methods to analyze interactions between CFP<sup>β-arrestin</sup> and YFP<sup>NHERF</sup> or PTHR<sup>CFP</sup>ETVM. *A*, CFP<sup>Membrane</sup> protein and YFP<sup>NHERF</sup> were used to exclude nonspecific YFP<sup>NHERF</sup> FRET interactions at the cell membrane. *B* and *C*, CFP<sup>EPAC</sup>YFP or YFP<sup>NHERF</sup> and PTHR<sup>CFP</sup>ETVM pair were used as positive interaction controls for donor dequenching after acceptor photobleaching. *D* and *E*, CFP<sup>β-arrestin-2</sup> and YFP<sup>NHERF</sup> or YFP<sup>β-arrestin-2</sup> and hPTH(1-34)-stimulated PTHR<sup>CFP</sup>ETVM FRET pairs were used to test interactions between β-arrestin and NHERF or PTH-stimulated PTHR respectively. Data shown correspond to ≥ 8–10 cells from 3 independent experiments.

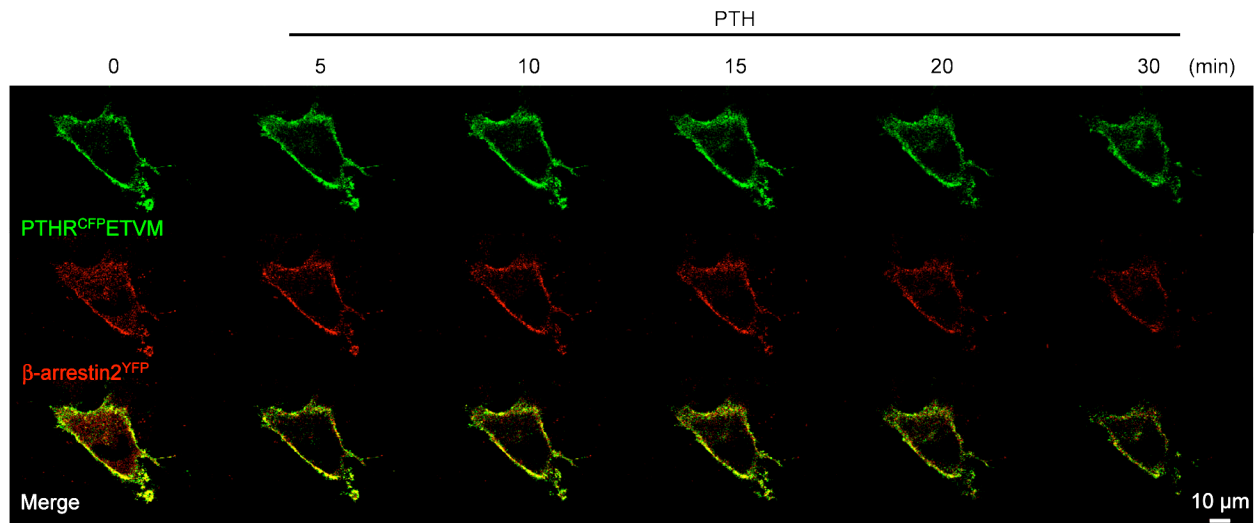

Supplementary Figure 3. **Recruitment of  $\beta$ -arrestin2 to PTHR at the cell membrane upon PTH stimulation.** ROS cells were transfected with <sup>YFP</sup> $\beta$ -arrestin2 and PTHR<sup>CFP</sup> and analyzed by confocal microscopy 24 h after transfection. Representative images from 6 independent experiments are shown in “false” color (CFP=green, YFP=red).

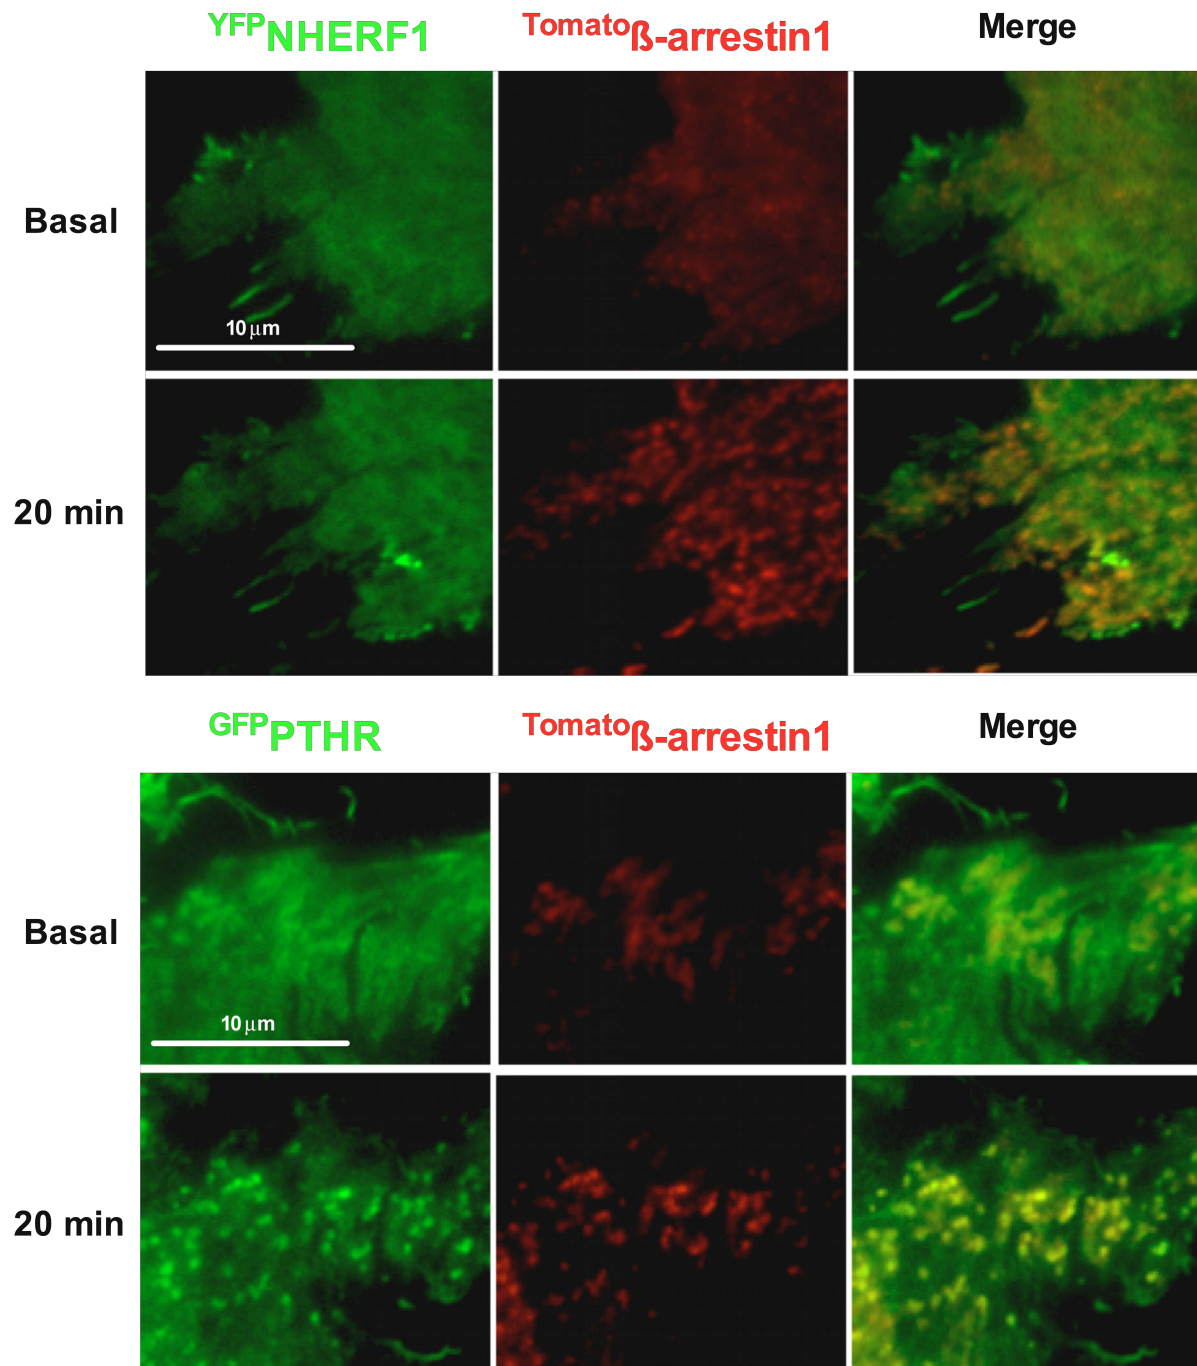

Supplementary Fig. 4. **Cell surface colocalization of NHERF1 and  $\beta$ -Arrestin1 or PTHR and  $\beta$ -Arrestin1.** ROS cells were transfected with YFP<sup>NHERF</sup> or GFP<sup>PTHR</sup> and Tomato<sup>β-Arrestin1</sup> and analyzed by TIRF microscopy 24 h after transfection. Colocalization of NHERF1 or PTHR with  $\beta$ -Arrestin1 was quantified by calculating Pearson's correlation coefficient as described in Materials and Methods.
